# Supplementary material
Source: publisher figshare collection journal article supplement (https://gsajournals.figshare.com/articles/dataset/_/10006634)
Supplement: Supplementary file 1 [file 1]

## Sheet: Table S3
Table S3: List of random deletions generated per genome in order to test the deletion identification pipeline.
Fly	Chromosome	Position	Position of Deletion	Deletion Category	Deletion Size
0	chr3L	14132323	chr3L:14132323-14132327	1-10 bp	5
0	chr2R	18741645	chr2R:18741645-18741647	1-10 bp	3
0	chr2R	3275666	chr2R:3275666-3275666	1-10 bp	1
0	chr2R	5143692	chr2R:5143692-5143697	1-10 bp	6
0	chr3R	23538999	chr3R:23538999-23539838	1-1000 bp	840
0	chr2L	8560651	chr2L:8560651-8561268	1-1000 bp	618
1	chr3L	11563717	chr3L:11563717-11563720	1-10 bp	4
1	chr2L	749971	chr2L:749971-750026	1-1000 bp	56
1	chr3R	16978125	chr3R:16978125-16979049	1-1000 bp	925
2	chr3R	17386583	chr3R:17386583-17386589	1-10 bp	7
2	chr3R	16783505	chr3R:16783505-16783506	1-10 bp	2
2	chr2R	8574578	chr2R:8574578-8574585	1-10 bp	8
2	chr2R	4125649	chr2R:4125649-4125655	1-10 bp	7
2	chr2L	2415410	chr2L:2415410-2415887	1-1000 bp	478
2	chr3R	10117233	chr3R:10117233-10117744	1-1000 bp	512
3	chrX	809485	chrX:809485-809486	1-10 bp	2
4	chr2L	9577225	chr2L:9577225-9577229	1-10 bp	5
4	chrX	913210	chrX:913210-913215	1-10 bp	6
4	chr3R	7953903	chr3R:7953903-7953906	1-10 bp	4
4	chr2L	352449	chr2L:352449-353161	1-1000 bp	713
4	chr2R	10448914	chr2R:10448914-10448988	1-1000 bp	75
4	chr2R	12383275	chr2R:12383275-12383611	1-1000 bp	337
4	chr3L	10025265	chr3L:10025265-10025673	1-1000 bp	409
4	chrX	21080710	chrX:21080710-21081316	1-1000 bp	607
5	chr2L	23023179	chr2L:23023179-23023184	1-10 bp	6
5	chr3R	11935136	chr3R:11935136-11935139	1-10 bp	4
5	chrX	722624	chrX:722624-722631	1-10 bp	8
5	chr3L	7117581	chr3L:7117581-7117755	1-1000 bp	175
5	chr2L	16757799	chr2L:16757799-16758289	1-1000 bp	491
5	chrX	12833818	chrX:12833818-12833999	1-1000 bp	182
5	chr3L	22528513	chr3L:22528513-22529486	1-1000 bp	974
5	chr3R	18160438	chr3R:18160438-18161380	1-1000 bp	943
6	chrX	17680160	chrX:17680160-17680163	1-10 bp	4
6	chr2R	13780170	chr2R:13780170-13780170	1-10 bp	1
6	chr3R	5566357	chr3R:5566357-5566364	1-10 bp	8
6	chrX	416829	chrX:416829-417344	1-1000 bp	516
6	chr3L	9527152	chr3L:9527152-9527980	1-1000 bp	829
7	chr2R	5300288	chr2R:5300288-5300290	1-10 bp	3
7	chr3L	8095161	chr3L:8095161-8095170	1-10 bp	10
7	chr2L	20169584	chr2L:20169584-20170008	1-1000 bp	425
7	chr3L	4674547	chr3L:4674547-4675245	1-1000 bp	699
7	chr3R	8682480	chr3R:8682480-8683251	1-1000 bp	772
8	chr3L	13172184	chr3L:13172184-13172188	1-10 bp	5
8	chr3R	13592735	chr3R:13592735-13592737	1-10 bp	3
8	chr3L	3116693	chr3L:3116693-3116819	1-1000 bp	127
8	chr3R	15022251	chr3R:15022251-15022689	1-1000 bp	439
8	chrX	7119655	chrX:7119655-7120003	1-1000 bp	349
8	chr3L	18079756	chr3L:18079756-18079820	1-1000 bp	65
9	chr3R	14805751	chr3R:14805751-14805759	1-10 bp	9
9	chr2L	16839486	chr2L:16839486-16839636	1-1000 bp	151
9	chr3L	21271781	chr3L:21271781-21272659	1-1000 bp	879
9	chr3R	17796312	chr3R:17796312-17796749	1-1000 bp	438
9	chrX	2834655	chrX:2834655-2834763	1-1000 bp	109
9	chr3R	11027840	chr3R:11027840-11028609	1-1000 bp	770
9	chr3R	6374875	chr3R:6374875-6375609	1-1000 bp	735
9	chr2L	8848951	chr2L:8848951-8849369	1-1000 bp	419
9	chrX	13080829	chrX:13080829-13081094	1-1000 bp	266
10	chr3L	5490456	chr3L:5490456-5490457	1-10 bp	2
10	chr2L	18676268	chr2L:18676268-18676274	1-10 bp	7
10	chr3R	17086198	chr3R:17086198-17086198	1-10 bp	1
10	chr2R	12438985	chr2R:12438985-12438987	1-10 bp	3
10	chr3R	6630240	chr3R:6630240-6630247	1-10 bp	8
10	chr2L	2752347	chr2L:2752347-2752351	1-10 bp	5
10	chr2R	5513935	chr2R:5513935-5514505	1-1000 bp	571
10	chr3L	3620420	chr3L:3620420-3620819	1-1000 bp	400
10	chr2L	11384996	chr2L:11384996-11385794	1-1000 bp	799
10	chr3L	15408022	chr3L:15408022-15408024	1-1000 bp	3
10	chrX	4041710	chrX:4041710-4042499	1-1000 bp	790
10	chr3R	21391029	chr3R:21391029-21391086	1-1000 bp	58
10	chr3L	16370143	chr3L:16370143-16370283	1-1000 bp	141
11	chr3L	27690039	chr3L:27690039-27690046	1-10 bp	8
11	chr3R	4712197	chr3R:4712197-4712205	1-10 bp	9
11	chr2L	1098557	chr2L:1098557-1098561	1-10 bp	5
12	chr3R	7721788	chr3R:7721788-7721794	1-10 bp	7
12	chr3L	11118337	chr3L:11118337-11118337	1-10 bp	1
12	chr2R	4904068	chr2R:4904068-4904076	1-10 bp	9
12	chr3R	30129747	chr3R:30129747-30129755	1-10 bp	9
12	chr2L	6744007	chr2L:6744007-6744012	1-10 bp	6
12	chrX	21997751	chrX:21997751-21998316	1-1000 bp	566
13	chrX	15933588	chrX:15933588-15933594	1-10 bp	7
13	chr3L	18089939	chr3L:18089939-18089943	1-10 bp	5
13	chrX	6187674	chrX:6187674-6187681	1-10 bp	8
13	chr3R	25184907	chr3R:25184907-25184916	1-10 bp	10
13	chr2L	21338980	chr2L:21338980-21338989	1-10 bp	10
13	chr2L	13802370	chr2L:13802370-13802379	1-10 bp	10
13	chr2R	1598503	chr2R:1598503-1598507	1-10 bp	5
13	chrX	3005609	chrX:3005609-3006536	1-1000 bp	928
13	chr3R	8424625	chr3R:8424625-8425353	1-1000 bp	729
14	chr2L	8194990	chr2L:8194990-8194999	1-10 bp	10
14	chr2L	3649220	chr2L:3649220-3649225	1-10 bp	6
14	chrX	9794343	chrX:9794343-9794343	1-10 bp	1
14	chr2R	13683871	chr2R:13683871-13684376	1-1000 bp	506
14	chr3R	31837420	chr3R:31837420-31837997	1-1000 bp	578
14	chr3L	11120287	chr3L:11120287-11121135	1-1000 bp	849
14	chr2R	17328049	chr2R:17328049-17328637	1-1000 bp	589
14	chrX	6164945	chrX:6164945-6165492	1-1000 bp	548
14	chr2L	22160933	chr2L:22160933-22161242	1-1000 bp	310
14	chrX	14710529	chrX:14710529-14711079	1-1000 bp	551
15	chr3R	9573072	chr3R:9573072-9573077	1-10 bp	6
15	chrX	22945418	chrX:22945418-22945422	1-10 bp	5
15	chr2L	10628614	chr2L:10628614-10628622	1-10 bp	9
15	chr3L	5929685	chr3L:5929685-5930530	1-1000 bp	846
15	chrX	15610927	chrX:15610927-15610960	1-1000 bp	34
15	chr3R	4002091	chr3R:4002091-4002164	1-1000 bp	74
16	chr2R	12456866	chr2R:12456866-12456869	1-10 bp	4
16	chr2R	15724069	chr2R:15724069-15724077	1-10 bp	9
16	chr2R	10521660	chr2R:10521660-10522616	1-1000 bp	957
16	chr3L	16906250	chr3L:16906250-16906935	1-1000 bp	686
16	chr2L	3401682	chr2L:3401682-3402212	1-1000 bp	531
16	chr3L	21453408	chr3L:21453408-21453796	1-1000 bp	389
17	chr3L	15725867	chr3L:15725867-15725875	1-10 bp	9
17	chr2R	645263	chr2R:645263-645267	1-10 bp	5
17	chr3R	27436488	chr3R:27436488-27436496	1-10 bp	9
17	chr2L	5467484	chr2L:5467484-5467484	1-10 bp	1
17	chr3R	11152164	chr3R:11152164-11152874	1-1000 bp	711
17	chr2R	10493347	chr2R:10493347-10493356	1-1000 bp	10
17	chrX	4111602	chrX:4111602-4112011	1-1000 bp	410
17	chr3L	21250473	chr3L:21250473-21251346	1-1000 bp	874
18	chr3L	25994379	chr3L:25994379-25994387	1-10 bp	9
18	chr3L	2309729	chr3L:2309729-2309734	1-10 bp	6
18	chrX	5412575	chrX:5412575-5412576	1-10 bp	2
18	chr3L	25592668	chr3L:25592668-25592676	1-10 bp	9
18	chr2R	14060896	chr2R:14060896-14060982	1-1000 bp	87
18	chrX	6552155	chrX:6552155-6552945	1-1000 bp	791
18	chr2L	12127397	chr2L:12127397-12127916	1-1000 bp	520
19	chr3R	23811944	chr3R:23811944-23811947	1-10 bp	4
19	chr3R	13547958	chr3R:13547958-13548662	1-1000 bp	705
20	chr2R	10602212	chr2R:10602212-10602218	1-10 bp	7
20	chr2L	11256069	chr2L:11256069-11256074	1-10 bp	6
20	chr3L	2471592	chr3L:2471592-2471599	1-10 bp	8
20	chr3L	27286034	chr3L:27286034-27286038	1-10 bp	5
20	chr3L	20634599	chr3L:20634599-20634604	1-10 bp	6
20	chr2R	24764652	chr2R:24764652-24764653	1-10 bp	2
20	chr2L	14400879	chr2L:14400879-14401015	1-1000 bp	137
20	chr3L	21928295	chr3L:21928295-21928679	1-1000 bp	385
20	chr3L	494304	chr3L:494304-494770	1-1000 bp	467
20	chr2L	320543	chr2L:320543-321484	1-1000 bp	942
20	chr3L	27362018	chr3L:27362018-27362704	1-1000 bp	687
21	chr3R	6490375	chr3R:6490375-6491357	1-1000 bp	983
21	chr3L	1283580	chr3L:1283580-1283696	1-1000 bp	117
21	chr3R	30225019	chr3R:30225019-30225353	1-1000 bp	335
21	chr2L	10348797	chr2L:10348797-10349104	1-1000 bp	308
21	chr2R	3051539	chr2R:3051539-3051708	1-1000 bp	170
21	chr3R	18112477	chr3R:18112477-18113119	1-1000 bp	643
22	chr3L	22380052	chr3L:22380052-22380056	1-10 bp	5
22	chr2R	20296812	chr2R:20296812-20296820	1-10 bp	9
22	chr2R	9045943	chr2R:9045943-9045949	1-10 bp	7
22	chr2L	9217325	chr2L:9217325-9217333	1-10 bp	9
22	chr3L	24039063	chr3L:24039063-24039887	1-1000 bp	825
22	chr3L	10981514	chr3L:10981514-10981966	1-1000 bp	453
22	chr3R	12138809	chr3R:12138809-12139455	1-1000 bp	647
22	chr2L	7350815	chr2L:7350815-7351662	1-1000 bp	848
22	chr3L	25879662	chr3L:25879662-25879839	1-1000 bp	178
22	chr3L	893067	chr3L:893067-894002	1-1000 bp	936
22	chr2R	14465952	chr2R:14465952-14466329	1-1000 bp	378
22	chr2R	16224688	chr2R:16224688-16224955	1-1000 bp	268
23	chrX	19863985	chrX:19863985-19863991	1-10 bp	7
23	chr3L	2747597	chr3L:2747597-2747599	1-10 bp	3
24	chr3L	27937722	chr3L:27937722-27937731	1-10 bp	10
24	chr2L	19109680	chr2L:19109680-19109684	1-10 bp	5
24	chr2L	6737901	chr2L:6737901-6738081	1-1000 bp	181
24	chr2R	9513500	chr2R:9513500-9513649	1-1000 bp	150
24	chr2L	17082977	chr2L:17082977-17083365	1-1000 bp	389
24	chr3L	24495492	chr3L:24495492-24496441	1-1000 bp	950
24	chr2R	305164	chr2R:305164-306160	1-1000 bp	997
24	chr2R	18433570	chr2R:18433570-18434490	1-1000 bp	921
25	chr3R	20821884	chr3R:20821884-20821890	1-10 bp	7
25	chr3L	7060691	chr3L:7060691-7060695	1-10 bp	5
25	chr3R	22715729	chr3R:22715729-22715732	1-10 bp	4
25	chr3L	25383216	chr3L:25383216-25383217	1-10 bp	2
25	chr3L	2736921	chr3L:2736921-2736929	1-10 bp	9
25	chrX	20068066	chrX:20068066-20068072	1-10 bp	7
25	chr2L	4151494	chr2L:4151494-4151749	1-1000 bp	256
25	chr3L	844670	chr3L:844670-845207	1-1000 bp	538
25	chr2R	24003834	chr2R:24003834-24004248	1-1000 bp	415
25	chrX	3078461	chrX:3078461-3079093	1-1000 bp	633
26	chrX	10915383	chrX:10915383-10915391	1-10 bp	9
26	chr2R	21672323	chr2R:21672323-21672323	1-10 bp	1
26	chr2L	4442152	chr2L:4442152-4442476	1-1000 bp	325
26	chr3R	32056671	chr3R:32056671-32056828	1-1000 bp	158
27	chr2R	6061521	chr2R:6061521-6061529	1-10 bp	9
27	chr3L	17170369	chr3L:17170369-17170369	1-10 bp	1
27	chr3R	11882648	chr3R:11882648-11882657	1-10 bp	10
27	chr2R	6853970	chr2R:6853970-6853974	1-10 bp	5
27	chr2R	5950603	chr2R:5950603-5950609	1-10 bp	7
27	chr3R	30245300	chr3R:30245300-30245307	1-10 bp	8
27	chr3L	21865942	chr3L:21865942-21866244	1-1000 bp	303
27	chrX	5526979	chrX:5526979-5527122	1-1000 bp	144
28	chr2R	24348161	chr2R:24348161-24348162	1-10 bp	2
28	chr3L	20818027	chr3L:20818027-20818035	1-10 bp	9
28	chr2R	23315364	chr2R:23315364-23315969	1-1000 bp	606
28	chrX	23273856	chrX:23273856-23274479	1-1000 bp	624
29	chr2L	9193908	chr2L:9193908-9194564	1-1000 bp	657
29	chr3R	30009861	chr3R:30009861-30010837	1-1000 bp	977
29	chr2R	7949225	chr2R:7949225-7949555	1-1000 bp	331
29	chr3R	8845666	chr3R:8845666-8845811	1-1000 bp	146
29	chrX	6144479	chrX:6144479-6144586	1-1000 bp	108
29	chrX	7127528	chrX:7127528-7128355	1-1000 bp	828
29	chr3L	7555647	chr3L:7555647-7556334	1-1000 bp	688
30	chr2L	7964144	chr2L:7964144-7964146	1-10 bp	3
30	chr2R	9108458	chr2R:9108458-9108466	1-10 bp	9
30	chr3L	11242536	chr3L:11242536-11242540	1-10 bp	5
30	chr2L	8328178	chr2L:8328178-8328179	1-10 bp	2
30	chr2L	22001420	chr2L:22001420-22001428	1-10 bp	9
30	chr3L	12100659	chr3L:12100659-12100663	1-10 bp	5
30	chr2L	18620609	chr2L:18620609-18620609	1-10 bp	1
30	chr2R	15146424	chr2R:15146424-15146433	1-10 bp	10
30	chr3R	19636773	chr3R:19636773-19636773	1-10 bp	1
30	chr3R	26754741	chr3R:26754741-26755044	1-1000 bp	304
30	chr2R	9485462	chr2R:9485462-9486459	1-1000 bp	998
30	chr3R	16497339	chr3R:16497339-16497733	1-1000 bp	395
31	chr3R	879577	chr3R:879577-879581	1-10 bp	5
31	chr2L	11665196	chr2L:11665196-11665197	1-10 bp	2
31	chr3R	27655831	chr3R:27655831-27655834	1-10 bp	4
31	chr2R	9251866	chr2R:9251866-9251875	1-10 bp	10
31	chr3L	5172846	chr3L:5172846-5173818	1-1000 bp	973
31	chrX	19343471	chrX:19343471-19343872	1-1000 bp	402
31	chr3L	2437409	chr3L:2437409-2437735	1-1000 bp	327
31	chr3L	21487490	chr3L:21487490-21487896	1-1000 bp	407
31	chrX	15883340	chrX:15883340-15883914	1-1000 bp	575
32	chr2L	9993543	chr2L:9993543-9993549	1-10 bp	7
32	chr3R	11229099	chr3R:11229099-11230018	1-1000 bp	920
33	chrX	14144596	chrX:14144596-14144604	1-10 bp	9
33	chrX	13389921	chrX:13389921-13389925	1-10 bp	5
33	chr3R	158035	chr3R:158035-158043	1-10 bp	9
33	chr3R	22424505	chr3R:22424505-22424512	1-10 bp	8
33	chrX	18636009	chrX:18636009-18636485	1-1000 bp	477
33	chr2L	7920688	chr2L:7920688-7921223	1-1000 bp	536
33	chrX	17860280	chrX:17860280-17860800	1-1000 bp	521
33	chr3R	31090703	chr3R:31090703-31090886	1-1000 bp	184
33	chr2L	11052961	chr2L:11052961-11053418	1-1000 bp	458
33	chr3L	16628473	chr3L:16628473-16628943	1-1000 bp	471
33	chr3L	22410600	chr3L:22410600-22411030	1-1000 bp	431
33	chr3R	1854439	chr3R:1854439-1854703	1-1000 bp	265
34	chrX	16272104	chrX:16272104-16272108	1-10 bp	5
34	chr3R	19907295	chr3R:19907295-19907296	1-10 bp	2
34	chr3L	27182275	chr3L:27182275-27182283	1-10 bp	9
34	chr3L	6509350	chr3L:6509350-6509359	1-10 bp	10
34	chr3L	2766863	chr3L:2766863-2766869	1-10 bp	7
34	chr2L	23329967	chr2L:23329967-23330089	1-1000 bp	123
34	chr3L	1139955	chr3L:1139955-1140138	1-1000 bp	184
34	chr3R	6751570	chr3R:6751570-6751623	1-1000 bp	54
34	chr3L	18728094	chr3L:18728094-18728193	1-1000 bp	100
35	chr2R	7052758	chr2R:7052758-7052761	1-1000 bp	4
35	chrX	11000752	chrX:11000752-11001259	1-1000 bp	508
36	chr3L	5054539	chr3L:5054539-5054539	1-10 bp	1
36	chr2R	23882660	chr2R:23882660-23882667	1-10 bp	8
36	chr2L	21773501	chr2L:21773501-21773826	1-1000 bp	326
36	chr3R	22745758	chr3R:22745758-22746207	1-1000 bp	450
36	chr3R	20850880	chr3R:20850880-20851174	1-1000 bp	295
36	chrX	1874963	chrX:1874963-1875311	1-1000 bp	349
36	chr2R	7373979	chr2R:7373979-7374245	1-1000 bp	267
36	chr3L	600414	chr3L:600414-601412	1-1000 bp	999
36	chr2L	20362082	chr2L:20362082-20362352	1-1000 bp	271
36	chr3R	9392102	chr3R:9392102-9392774	1-1000 bp	673
36	chr2R	6887158	chr2R:6887158-6887505	1-1000 bp	348
37	chr3L	9264836	chr3L:9264836-9264841	1-10 bp	6
37	chr3L	10255351	chr3L:10255351-10255360	1-10 bp	10
37	chrX	16036541	chrX:16036541-16036544	1-10 bp	4
37	chr2R	6770724	chr2R:6770724-6770733	1-10 bp	10
37	chrX	13379915	chrX:13379915-13380110	1-1000 bp	196
37	chr3L	17769957	chr3L:17769957-17770586	1-1000 bp	630
38	chrX	9455435	chrX:9455435-9455435	1-10 bp	1
38	chr2L	14188637	chr2L:14188637-14188645	1-10 bp	9
38	chrX	8819397	chrX:8819397-8819398	1-10 bp	2
38	chrX	10216009	chrX:10216009-10216009	1-10 bp	1
38	chr2L	11985804	chr2L:11985804-11985806	1-10 bp	3
38	chr3L	659889	chr3L:659889-659889	1-10 bp	1
38	chr3L	8890322	chr3L:8890322-8890424	1-1000 bp	103
38	chr2R	5406110	chr2R:5406110-5406747	1-1000 bp	638
38	chr2L	22719008	chr2L:22719008-22719828	1-1000 bp	821
38	chr3L	1614670	chr3L:1614670-1614905	1-1000 bp	236
38	chr2R	21280112	chr2R:21280112-21280420	1-1000 bp	309
38	chr3R	15921615	chr3R:15921615-15922351	1-1000 bp	737
38	chr2L	6017879	chr2L:6017879-6018297	1-1000 bp	419
38	chr2R	11834907	chr2R:11834907-11835133	1-1000 bp	227
38	chrX	3199151	chrX:3199151-3199843	1-1000 bp	693
39	chr2R	24410573	chr2R:24410573-24410582	1-10 bp	10
39	chr2L	15264115	chr2L:15264115-15264118	1-10 bp	4
39	chr3L	20031058	chr3L:20031058-20031771	1-1000 bp	714
39	chr3R	15655263	chr3R:15655263-15655754	1-1000 bp	492
39	chr3L	16216836	chr3L:16216836-16217792	1-1000 bp	957
39	chr3L	1689692	chr3L:1689692-1690166	1-1000 bp	475
40	chrX	9704219	chrX:9704219-9704226	1-10 bp	8
40	chr2L	13868336	chr2L:13868336-13868343	1-10 bp	8
40	chr3R	20224845	chr3R:20224845-20224977	1-1000 bp	133
40	chr2R	25068113	chr2R:25068113-25068951	1-1000 bp	839
41	chr3L	18635582	chr3L:18635582-18635590	1-10 bp	9
41	chr3R	6953978	chr3R:6953978-6953981	1-10 bp	4
41	chr3L	19473419	chr3L:19473419-19473422	1-10 bp	4
41	chrX	18504508	chrX:18504508-18504946	1-1000 bp	439
41	chr3R	6368325	chr3R:6368325-6368642	1-1000 bp	318
41	chr2L	1067011	chr2L:1067011-1067413	1-1000 bp	403
42	chr3R	22095869	chr3R:22095869-22095994	1-1000 bp	126
43	chr2R	13352900	chr2R:13352900-13352903	1-10 bp	4
43	chr3L	24285833	chr3L:24285833-24285835	1-10 bp	3
43	chr3R	9242068	chr3R:9242068-9242612	1-1000 bp	545
43	chr2R	20460949	chr2R:20460949-20461149	1-1000 bp	201
43	chrX	3689389	chrX:3689389-3690306	1-1000 bp	918
44	chr2R	17994839	chr2R:17994839-17994844	1-10 bp	6
44	chr3L	21775113	chr3L:21775113-21775118	1-10 bp	6
44	chr2L	282080	chr2L:282080-282083	1-10 bp	4
44	chr3R	4548614	chr3R:4548614-4548616	1-10 bp	3
44	chr2L	20943373	chr2L:20943373-20943382	1-10 bp	10
44	chr2L	21894576	chr2L:21894576-21894584	1-10 bp	9
44	chr3L	26319319	chr3L:26319319-26319685	1-1000 bp	367
44	chr2L	9874892	chr2L:9874892-9875444	1-1000 bp	553
44	chr2L	22991849	chr2L:22991849-22992647	1-1000 bp	799
45	chrX	10953702	chrX:10953702-10953706	1-10 bp	5
45	chr3R	11661225	chr3R:11661225-11662022	1-1000 bp	798
45	chr2R	22030969	chr2R:22030969-22031064	1-1000 bp	96
45	chrX	38615	chrX:38615-38778	1-1000 bp	164
45	chr3R	16665460	chr3R:16665460-16665525	1-1000 bp	66
45	chr3L	1139267	chr3L:1139267-1139688	1-1000 bp	422
46	chr2L	21990853	chr2L:21990853-21990862	1-10 bp	10
46	chr3R	23363578	chr3R:23363578-23363587	1-10 bp	10
46	chr2L	19136974	chr2L:19136974-19136981	1-10 bp	8
46	chrX	23278559	chrX:23278559-23278565	1-10 bp	7
46	chr3R	17183323	chr3R:17183323-17183332	1-10 bp	10
46	chr3L	14045418	chr3L:14045418-14046092	1-1000 bp	675
46	chr2R	9687886	chr2R:9687886-9688460	1-1000 bp	575
46	chr2R	19097552	chr2R:19097552-19097897	1-1000 bp	346
46	chrX	22233926	chrX:22233926-22234712	1-1000 bp	787
46	chrX	1223678	chrX:1223678-1224433	1-1000 bp	756
46	chr3R	11103607	chr3R:11103607-11103823	1-1000 bp	217
47	chr3R	30593977	chr3R:30593977-30593984	1-10 bp	8
47	chrX	12535084	chrX:12535084-12535086	1-10 bp	3
47	chr2R	3769895	chr2R:3769895-3769901	1-10 bp	7
47	chr3R	13707464	chr3R:13707464-13708333	1-1000 bp	870
47	chr3L	24081525	chr3L:24081525-24081563	1-1000 bp	39
48	chr3L	25852642	chr3L:25852642-25852648	1-10 bp	7
48	chr2R	12317959	chr2R:12317959-12317964	1-10 bp	6
48	chr3R	14587061	chr3R:14587061-14587065	1-10 bp	5
48	chrX	13459261	chrX:13459261-13459266	1-10 bp	6
48	chr3R	12789167	chr3R:12789167-12789174	1-10 bp	8
48	chr2L	19616410	chr2L:19616410-19616512	1-1000 bp	103
48	chr3R	26777496	chr3R:26777496-26778400	1-1000 bp	905
49	chr3R	25565029	chr3R:25565029-25565033	1-10 bp	5
49	chr2L	5235325	chr2L:5235325-5235331	1-10 bp	7
49	chr3R	18542154	chr3R:18542154-18542154	1-10 bp	1
49	chrX	10385209	chrX:10385209-10385213	1-10 bp	5
49	chr3L	18593239	chr3L:18593239-18593245	1-10 bp	7
49	chrX	12257302	chrX:12257302-12257309	1-10 bp	8
49	chr3L	20169488	chr3L:20169488-20170213	1-1000 bp	726
50	chr3R	1752546	chr3R:1752546-1752547	1-10 bp	2
50	chr3L	23267602	chr3L:23267602-23267608	1-10 bp	7
50	chr3R	27549952	chr3R:27549952-27549952	1-10 bp	1
50	chr2R	6158243	chr2R:6158243-6158244	1-10 bp	2
50	chr3R	27582769	chr3R:27582769-27583340	1-1000 bp	572
51	chr2R	5778979	chr2R:5778979-5778980	1-10 bp	2
51	chr2R	19562194	chr2R:19562194-19562201	1-10 bp	8
51	chr2R	9614440	chr2R:9614440-9615131	1-1000 bp	692
51	chrX	18554834	chrX:18554834-18555774	1-1000 bp	941
51	chr3L	6939584	chr3L:6939584-6940079	1-1000 bp	496
51	chr2R	5978842	chr2R:5978842-5979042	1-1000 bp	201
52	chr3R	17830403	chr3R:17830403-17830403	1-10 bp	1
52	chr2L	7511186	chr2L:7511186-7511189	1-10 bp	4
52	chrX	235959	chrX:235959-235965	1-10 bp	7
52	chrX	19339831	chrX:19339831-19339837	1-10 bp	7
52	chr3L	2650866	chr3L:2650866-2651836	1-1000 bp	971
52	chr3L	10278484	chr3L:10278484-10278927	1-1000 bp	444
52	chr3R	11930727	chr3R:11930727-11931383	1-1000 bp	657
52	chr3R	9312328	chr3R:9312328-9312408	1-1000 bp	81
52	chr3L	19371556	chr3L:19371556-19372332	1-1000 bp	777
52	chr3R	11216547	chr3R:11216547-11216631	1-1000 bp	85
52	chr3L	3391525	chr3L:3391525-3392295	1-1000 bp	771
53	chr3R	13204880	chr3R:13204880-13204888	1-10 bp	9
53	chr3L	26080515	chr3L:26080515-26080519	1-10 bp	5
53	chr2L	6236679	chr2L:6236679-6236684	1-10 bp	6
53	chr3L	13487131	chr3L:13487131-13487140	1-10 bp	10
53	chr2R	4293749	chr2R:4293749-4293758	1-10 bp	10
53	chr2L	19054952	chr2L:19054952-19054952	1-10 bp	1
53	chr3L	16693013	chr3L:16693013-16693022	1-10 bp	10
53	chr3R	22930398	chr3R:22930398-22930407	1-10 bp	10
53	chrX	629627	chrX:629627-629835	1-1000 bp	209
54	chr3R	26357334	chr3R:26357334-26357336	1-10 bp	3
54	chrX	494411	chrX:494411-495072	1-1000 bp	662
54	chr3L	20403378	chr3L:20403378-20403979	1-1000 bp	602
54	chrX	4348234	chrX:4348234-4348512	1-1000 bp	279
54	chr2R	2015931	chr2R:2015931-2016772	1-1000 bp	842
55	chr3R	18479188	chr3R:18479188-18479188	1-10 bp	1
55	chr2R	14631489	chr2R:14631489-14631492	1-10 bp	4
55	chr3R	12026705	chr3R:12026705-12026836	1-1000 bp	132
55	chr2R	25065054	chr2R:25065054-25065616	1-1000 bp	563
56	chr2R	9813774	chr2R:9813774-9813775	1-10 bp	2
56	chrX	22907696	chrX:22907696-22907697	1-10 bp	2
56	chr3L	12187566	chr3L:12187566-12188008	1-1000 bp	443
56	chr2R	17440558	chr2R:17440558-17441287	1-1000 bp	730
56	chr3L	20397115	chr3L:20397115-20397436	1-1000 bp	322
56	chr2R	10065453	chr2R:10065453-10066239	1-1000 bp	787
56	chr2L	20597099	chr2L:20597099-20597456	1-1000 bp	358
57	chr2L	7422854	chr2L:7422854-7422860	1-10 bp	7
57	chr2L	17238304	chr2L:17238304-17238310	1-10 bp	7
57	chr3L	7352402	chr3L:7352402-7352408	1-10 bp	7
57	chr3L	1001591	chr3L:1001591-1001623	1-1000 bp	33
57	chr2R	17432987	chr2R:17432987-17433077	1-1000 bp	91
57	chr2R	9184415	chr2R:9184415-9184628	1-1000 bp	214
57	chr3R	6375594	chr3R:6375594-6376318	1-1000 bp	725
58	chr2L	13197609	chr2L:13197609-13197613	1-10 bp	5
58	chrX	17062154	chrX:17062154-17062155	1-10 bp	2
58	chr3R	9961556	chr3R:9961556-9961557	1-10 bp	2
58	chrX	6116207	chrX:6116207-6116209	1-10 bp	3
58	chr2L	2687016	chr2L:2687016-2687019	1-10 bp	4
58	chr3R	19779526	chr3R:19779526-19779527	1-10 bp	2
58	chr3L	10122071	chr3L:10122071-10122979	1-1000 bp	909
58	chr3R	30698042	chr3R:30698042-30698729	1-1000 bp	688
58	chr2L	21871	chr2L:21871-22239	1-1000 bp	369
58	chr3R	25513285	chr3R:25513285-25513360	1-1000 bp	76
58	chr2R	9067287	chr2R:9067287-9067304	1-1000 bp	18
58	chr2R	17519728	chr2R:17519728-17520699	1-1000 bp	972
59	chr2R	5752613	chr2R:5752613-5752621	1-10 bp	9
59	chr2L	16822177	chr2L:16822177-16822183	1-10 bp	7
59	chrX	10403169	chrX:10403169-10403363	1-1000 bp	195
60	chr3R	19058030	chr3R:19058030-19058033	1-10 bp	4
60	chr2L	20227971	chr2L:20227971-20228217	1-1000 bp	247
60	chrX	11674565	chrX:11674565-11674802	1-1000 bp	238
60	chr2R	11378381	chr2R:11378381-11378807	1-1000 bp	427
61	chr2R	978015	chr2R:978015-978530	1-1000 bp	516
61	chr2R	13346731	chr2R:13346731-13347558	1-1000 bp	828
62	chr2L	17873225	chr2L:17873225-17873230	1-10 bp	6
62	chrX	13435130	chrX:13435130-13435138	1-10 bp	9
62	chr3R	4013433	chr3R:4013433-4013434	1-10 bp	2
62	chr2R	24411767	chr2R:24411767-24411774	1-10 bp	8
62	chr2R	14816811	chr2R:14816811-14816813	1-10 bp	3
62	chrX	7794338	chrX:7794338-7794346	1-10 bp	9
62	chrX	14607892	chrX:14607892-14607892	1-10 bp	1
62	chr3R	23134153	chr3R:23134153-23134156	1-10 bp	4
62	chr3R	29396679	chr3R:29396679-29397057	1-1000 bp	379
62	chr3L	15675365	chr3L:15675365-15675488	1-1000 bp	124
62	chrX	22229975	chrX:22229975-22230385	1-1000 bp	411
63	chr3L	8031485	chr3L:8031485-8031487	1-10 bp	3
63	chr3R	17448281	chr3R:17448281-17448285	1-10 bp	5
63	chrX	15562504	chrX:15562504-15563502	1-1000 bp	999
63	chr3L	27975598	chr3L:27975598-27976022	1-1000 bp	425
63	chr3L	10838964	chr3L:10838964-10839772	1-1000 bp	809
63	chr2R	20704026	chr2R:20704026-20704536	1-1000 bp	511
63	chr2L	21486490	chr2L:21486490-21486705	1-1000 bp	216
63	chr2R	2884016	chr2R:2884016-2884472	1-1000 bp	457
64	chr3L	7684975	chr3L:7684975-7684981	1-10 bp	7
64	chr2R	17983552	chr2R:17983552-17983552	1-10 bp	1
64	chrX	9948948	chrX:9948948-9948957	1-10 bp	10
64	chr3L	25336123	chr3L:25336123-25336474	1-1000 bp	352
64	chr3L	14462651	chr3L:14462651-14463216	1-1000 bp	566
65	chr2L	22692343	chr2L:22692343-22692346	1-10 bp	4
65	chr3L	20586295	chr3L:20586295-20586304	1-10 bp	10
65	chr2L	4142218	chr2L:4142218-4142226	1-10 bp	9
65	chr2L	5715055	chr2L:5715055-5715058	1-10 bp	4
65	chr2R	19215392	chr2R:19215392-19215399	1-10 bp	8
65	chr2L	11473842	chr2L:11473842-11473851	1-10 bp	10
65	chr3L	16467476	chr3L:16467476-16467587	1-1000 bp	112
65	chrX	2341103	chrX:2341103-2341803	1-1000 bp	701
65	chr2L	19943500	chr2L:19943500-19943869	1-1000 bp	370
65	chr2L	11061157	chr2L:11061157-11061662	1-1000 bp	506
66	chr3R	30429317	chr3R:30429317-30429324	1-10 bp	8
66	chrX	21263910	chrX:21263910-21263917	1-10 bp	8
66	chrX	8995437	chrX:8995437-8995439	1-10 bp	3
66	chrX	325542	chrX:325542-325551	1-10 bp	10
66	chr3L	2092332	chr3L:2092332-2092340	1-10 bp	9
66	chr3L	2416133	chr3L:2416133-2416138	1-10 bp	6
66	chrX	8068036	chrX:8068036-8068753	1-1000 bp	718
67	chr2L	22498205	chr2L:22498205-22498212	1-10 bp	8
67	chr2L	7604215	chr2L:7604215-7604218	1-10 bp	4
67	chrX	8889557	chrX:8889557-8889564	1-10 bp	8
67	chr3L	6261749	chr3L:6261749-6261749	1-10 bp	1
67	chr2L	19956957	chr2L:19956957-19957131	1-1000 bp	175
67	chrX	13695299	chrX:13695299-13695549	1-1000 bp	251
67	chr3R	1303185	chr3R:1303185-1303465	1-1000 bp	281
67	chr2L	19464609	chr2L:19464609-19465036	1-1000 bp	428
67	chr3R	18812392	chr3R:18812392-18812783	1-1000 bp	392
67	chrX	13337349	chrX:13337349-13337581	1-1000 bp	233
68	chr3R	22236534	chr3R:22236534-22236534	1-10 bp	1
68	chr2R	25213843	chr2R:25213843-25213848	1-10 bp	6
68	chr3L	22839733	chr3L:22839733-22840599	1-1000 bp	867
68	chr3L	21184746	chr3L:21184746-21185159	1-1000 bp	414
68	chr2L	19714418	chr2L:19714418-19714585	1-1000 bp	168
68	chr3R	31187528	chr3R:31187528-31188054	1-1000 bp	527
68	chr3R	25484081	chr3R:25484081-25484537	1-1000 bp	457
68	chrX	20518727	chrX:20518727-20518749	1-1000 bp	23
69	chr3L	16288237	chr3L:16288237-16288239	1-10 bp	3
69	chr3L	23469170	chr3L:23469170-23469173	1-10 bp	4
69	chr2L	4132613	chr2L:4132613-4132619	1-10 bp	7
69	chr2R	24324833	chr2R:24324833-24324842	1-10 bp	10
69	chr2L	11753739	chr2L:11753739-11753994	1-1000 bp	256
70	chr2L	9205320	chr2L:9205320-9205320	1-10 bp	1
70	chr2R	7248668	chr2R:7248668-7248677	1-10 bp	10
70	chrX	13807205	chrX:13807205-13807214	1-10 bp	10
70	chr3R	22885379	chr3R:22885379-22885632	1-1000 bp	254
71	chr3L	22715046	chr3L:22715046-22715051	1-10 bp	6
71	chr2L	22498820	chr2L:22498820-22498827	1-10 bp	8
71	chrX	19555987	chrX:19555987-19555987	1-10 bp	1
71	chr2R	1860668	chr2R:1860668-1860674	1-10 bp	7
71	chr3L	19728191	chr3L:19728191-19728196	1-10 bp	6
71	chrX	2918337	chrX:2918337-2918888	1-1000 bp	552
71	chr3L	15563989	chr3L:15563989-15564025	1-1000 bp	37
71	chr3L	2465106	chr3L:2465106-2465488	1-1000 bp	383
71	chr2R	19621676	chr2R:19621676-19622402	1-1000 bp	727
71	chr2L	21288421	chr2L:21288421-21288891	1-1000 bp	471
71	chr2L	4413626	chr2L:4413626-4413668	1-1000 bp	43
71	chr3R	5826904	chr3R:5826904-5827806	1-1000 bp	903
72	chr2L	21089273	chr2L:21089273-21089276	1-10 bp	4
72	chr2L	17068797	chr2L:17068797-17068797	1-10 bp	1
72	chr3L	17858876	chr3L:17858876-17858884	1-10 bp	9
72	chr3L	6900805	chr3L:6900805-6900811	1-10 bp	7
72	chr3L	4775041	chr3L:4775041-4775048	1-10 bp	8
72	chrX	7881164	chrX:7881164-7881169	1-10 bp	6
72	chr3L	8079678	chr3L:8079678-8080219	1-1000 bp	542
73	chr3R	22319771	chr3R:22319771-22320524	1-1000 bp	754
73	chr2R	852294	chr2R:852294-852987	1-1000 bp	694
73	chr3L	24130670	chr3L:24130670-24130699	1-1000 bp	30
73	chr3R	16646684	chr3R:16646684-16647256	1-1000 bp	573
73	chr3R	7489972	chr3R:7489972-7490449	1-1000 bp	478
73	chr2R	6961323	chr2R:6961323-6961866	1-1000 bp	544
73	chr3L	2685772	chr3L:2685772-2686664	1-1000 bp	893
73	chr2R	8073869	chr2R:8073869-8074714	1-1000 bp	846
73	chr2R	544982	chr2R:544982-545738	1-1000 bp	757
74	chr3R	30711653	chr3R:30711653-30711661	1-10 bp	9
74	chr2L	10990647	chr2L:10990647-10990655	1-10 bp	9
74	chr2L	18384971	chr2L:18384971-18384979	1-10 bp	9
74	chr2R	8426386	chr2R:8426386-8427340	1-1000 bp	955
74	chr2L	19461988	chr2L:19461988-19462564	1-1000 bp	577
74	chr2L	1486465	chr2L:1486465-1486628	1-1000 bp	164
75	chr3R	8969737	chr3R:8969737-8969744	1-10 bp	8
75	chrX	1989864	chrX:1989864-1989867	1-10 bp	4
75	chr3L	25304130	chr3L:25304130-25304130	1-10 bp	1
75	chr3L	21942548	chr3L:21942548-21942556	1-10 bp	9
75	chr2R	14399565	chr2R:14399565-14399574	1-10 bp	10
75	chrX	14798162	chrX:14798162-14798163	1-10 bp	2
75	chr3R	6159902	chr3R:6159902-6160836	1-1000 bp	935
75	chr3R	30108479	chr3R:30108479-30109247	1-1000 bp	769
75	chr3R	30388468	chr3R:30388468-30388858	1-1000 bp	391
76	chr2R	9582057	chr2R:9582057-9582059	1-10 bp	3
76	chrX	7405565	chrX:7405565-7405570	1-10 bp	6
76	chr3L	11850776	chr3L:11850776-11850832	1-1000 bp	57
76	chr3L	18769081	chr3L:18769081-18769924	1-1000 bp	844
77	chr2L	18256473	chr2L:18256473-18256476	1-10 bp	4
77	chr3R	13066307	chr3R:13066307-13066314	1-10 bp	8
77	chr3L	5993092	chr3L:5993092-5993099	1-10 bp	8
77	chr2L	13674309	chr2L:13674309-13674310	1-10 bp	2
77	chr2R	15467897	chr2R:15467897-15467902	1-10 bp	6
77	chrX	22801762	chrX:22801762-22801771	1-10 bp	10
77	chr3L	1765635	chr3L:1765635-1765640	1-1000 bp	6
77	chr2L	168140	chr2L:168140-169055	1-1000 bp	916
77	chr3R	9495806	chr3R:9495806-9495923	1-1000 bp	118
77	chr3R	1179467	chr3R:1179467-1179941	1-1000 bp	475
78	chr2R	12916378	chr2R:12916378-12916382	1-10 bp	5
78	chr2L	12272845	chr2L:12272845-12272854	1-10 bp	10
78	chr2R	7685129	chr2R:7685129-7685132	1-10 bp	4
78	chr3L	20422218	chr3L:20422218-20422226	1-10 bp	9
78	chr3L	5984128	chr3L:5984128-5984135	1-10 bp	8
78	chrX	12288713	chrX:12288713-12288719	1-10 bp	7
78	chr2R	8451437	chr2R:8451437-8451959	1-1000 bp	523
78	chr2R	18980458	chr2R:18980458-18981419	1-1000 bp	962
78	chr3L	5586935	chr3L:5586935-5587510	1-1000 bp	576
78	chr2L	2143752	chr2L:2143752-2144193	1-1000 bp	442
78	chr2L	5229479	chr2L:5229479-5229901	1-1000 bp	423
78	chr2L	9502732	chr2L:9502732-9503621	1-1000 bp	890
79	chr3L	3898481	chr3L:3898481-3899400	1-1000 bp	920
80	chrX	10794376	chrX:10794376-10795110	1-1000 bp	735
80	chrX	6943915	chrX:6943915-6944725	1-1000 bp	811
80	chr2R	24755223	chr2R:24755223-24756154	1-1000 bp	932
81	chr3R	4553665	chr3R:4553665-4553672	1-10 bp	8
81	chr3L	13289165	chr3L:13289165-13289169	1-10 bp	5
81	chr3R	15134113	chr3R:15134113-15134114	1-10 bp	2
81	chr3L	26459387	chr3L:26459387-26459395	1-10 bp	9
81	chr3L	24332696	chr3L:24332696-24333449	1-1000 bp	754
81	chrX	14913788	chrX:14913788-14914779	1-1000 bp	992
81	chr3R	24502817	chr3R:24502817-24503769	1-1000 bp	953
81	chr2L	17008280	chr2L:17008280-17008670	1-1000 bp	391
81	chr2R	4621859	chr2R:4621859-4622690	1-1000 bp	832
82	chr3L	7027857	chr3L:7027857-7028231	1-1000 bp	375
82	chr3L	4984593	chr3L:4984593-4985123	1-1000 bp	531
82	chr2R	6482761	chr2R:6482761-6482893	1-1000 bp	133
82	chr2R	15930808	chr2R:15930808-15931314	1-1000 bp	507
82	chr2R	12094795	chr2R:12094795-12095343	1-1000 bp	549
82	chr3L	11927745	chr3L:11927745-11927896	1-1000 bp	152
82	chr3L	25005688	chr3L:25005688-25006507	1-1000 bp	820
83	chr2R	24378311	chr2R:24378311-24378320	1-10 bp	10
83	chr2R	1825194	chr2R:1825194-1825203	1-10 bp	10
83	chr3L	3849541	chr3L:3849541-3849543	1-10 bp	3
83	chrX	222116	chrX:222116-222118	1-10 bp	3
83	chr2R	5434861	chr2R:5434861-5434862	1-10 bp	2
83	chrX	15603630	chrX:15603630-15603634	1-10 bp	5
83	chr2L	20740848	chr2L:20740848-20741065	1-1000 bp	218
83	chr2R	14320645	chr2R:14320645-14321364	1-1000 bp	720
83	chr3L	27787853	chr3L:27787853-27788734	1-1000 bp	882
83	chr3L	25916538	chr3L:25916538-25917473	1-1000 bp	936
83	chr2R	8769464	chr2R:8769464-8769692	1-1000 bp	229
83	chr2R	7629173	chr2R:7629173-7629607	1-1000 bp	435
83	chr3R	19867825	chr3R:19867825-19867911	1-1000 bp	87
83	chr2L	13195492	chr2L:13195492-13196069	1-1000 bp	578
83	chr3L	13823049	chr3L:13823049-13823745	1-1000 bp	697
84	chrX	11496903	chrX:11496903-11496910	1-10 bp	8
84	chr3L	21016047	chr3L:21016047-21016049	1-10 bp	3
84	chr2L	12633522	chr2L:12633522-12633530	1-10 bp	9
84	chr2L	13189677	chr2L:13189677-13189678	1-10 bp	2
84	chr3L	22369902	chr3L:22369902-22369905	1-10 bp	4
84	chr2R	3106874	chr2R:3106874-3106878	1-10 bp	5
84	chr3R	9869491	chr3R:9869491-9869991	1-1000 bp	501
85	chr2L	8678474	chr2L:8678474-8678475	1-10 bp	2
85	chr2R	22374151	chr2R:22374151-22374155	1-10 bp	5
85	chr2R	5867754	chr2R:5867754-5868494	1-1000 bp	741
85	chr3R	18424525	chr3R:18424525-18424720	1-1000 bp	196
85	chr3R	821037	chr3R:821037-821355	1-1000 bp	319
85	chr2L	5062394	chr2L:5062394-5063082	1-1000 bp	689
85	chr2L	4197820	chr2L:4197820-4198261	1-1000 bp	442
85	chr3L	8672067	chr3L:8672067-8672102	1-1000 bp	36
85	chr2L	1639034	chr2L:1639034-1639273	1-1000 bp	240
85	chr2R	15988245	chr2R:15988245-15988673	1-1000 bp	429
86	chrX	2093258	chrX:2093258-2093260	1-10 bp	3
86	chr3R	8801525	chr3R:8801525-8801534	1-10 bp	10
86	chr3R	20303488	chr3R:20303488-20303493	1-10 bp	6
86	chr3L	4254497	chr3L:4254497-4254497	1-10 bp	1
86	chr3R	755637	chr3R:755637-755945	1-1000 bp	309
86	chr2L	7684060	chr2L:7684060-7684390	1-1000 bp	331
86	chrX	11300330	chrX:11300330-11300643	1-1000 bp	314
87	chr3R	4509335	chr3R:4509335-4509336	1-10 bp	2
87	chrX	13618130	chrX:13618130-13618133	1-10 bp	4
87	chr2R	9430817	chr2R:9430817-9430817	1-10 bp	1
87	chr2L	6257078	chr2L:6257078-6257480	1-1000 bp	403
87	chr3R	5145190	chr3R:5145190-5145785	1-1000 bp	596
88	chrX	19908095	chrX:19908095-19908100	1-10 bp	6
88	chr3R	15857951	chr3R:15857951-15857958	1-10 bp	8
88	chr2R	11055903	chr2R:11055903-11056873	1-1000 bp	971
88	chr2L	16160873	chr2L:16160873-16161162	1-1000 bp	290
89	chr3R	486302	chr3R:486302-486309	1-10 bp	8
89	chr2L	3258670	chr2L:3258670-3258675	1-10 bp	6
89	chr3L	12697698	chr3L:12697698-12697700	1-10 bp	3
89	chr3L	18935791	chr3L:18935791-18935797	1-10 bp	7
89	chrX	10318203	chrX:10318203-10318906	1-1000 bp	704
89	chrX	13864511	chrX:13864511-13864638	1-1000 bp	128
89	chr3R	24167722	chr3R:24167722-24167819	1-1000 bp	98
90	chr3R	20903276	chr3R:20903276-20903280	1-10 bp	5
90	chr3R	7397333	chr3R:7397333-7397333	1-10 bp	1
90	chr3L	3127178	chr3L:3127178-3127944	1-1000 bp	767
90	chrX	7690291	chrX:7690291-7690489	1-1000 bp	199
90	chr2L	14311661	chr2L:14311661-14311858	1-1000 bp	198
90	chr2R	23574361	chr2R:23574361-23574956	1-1000 bp	596
90	chr3R	23921384	chr3R:23921384-23921690	1-1000 bp	307
90	chr2L	1902964	chr2L:1902964-1903030	1-1000 bp	67
90	chr3L	21681777	chr3L:21681777-21682362	1-1000 bp	586
90	chr2L	17170067	chr2L:17170067-17170492	1-1000 bp	426
91	chrX	20305496	chrX:20305496-20305505	1-10 bp	10
91	chr3R	13635140	chr3R:13635140-13635142	1-10 bp	3
91	chr3R	860346	chr3R:860346-860355	1-10 bp	10
91	chrX	16170102	chrX:16170102-16170868	1-1000 bp	767
91	chr3L	354283	chr3L:354283-354847	1-1000 bp	565
91	chr3R	5509492	chr3R:5509492-5510361	1-1000 bp	870
91	chr3R	16270962	chr3R:16270962-16271938	1-1000 bp	977
91	chr3L	20307387	chr3L:20307387-20308339	1-1000 bp	953
92	chr3L	26966431	chr3L:26966431-26966438	1-10 bp	8
92	chrX	19531527	chrX:19531527-19531529	1-10 bp	3
92	chr3R	7412057	chr3R:7412057-7412335	1-1000 bp	279
92	chrX	14679693	chrX:14679693-14679773	1-1000 bp	81
92	chrX	22704181	chrX:22704181-22704938	1-1000 bp	758
92	chr2L	23044236	chr2L:23044236-23044717	1-1000 bp	482
92	chr3R	18462981	chr3R:18462981-18463458	1-1000 bp	478
92	chr3R	30232384	chr3R:30232384-30233234	1-1000 bp	851
93	chrX	22287584	chrX:22287584-22287587	1-10 bp	4
93	chr3R	20864736	chr3R:20864736-20864737	1-10 bp	2
93	chrX	20476167	chrX:20476167-20476170	1-10 bp	4
93	chr2L	15488845	chr2L:15488845-15489763	1-1000 bp	919
93	chr2R	10897791	chr2R:10897791-10898118	1-1000 bp	328
94	chr2L	9620411	chr2L:9620411-9620419	1-10 bp	9
94	chr2L	19582586	chr2L:19582586-19582592	1-10 bp	7
94	chr3L	24926154	chr3L:24926154-24926155	1-10 bp	2
94	chr2R	8769117	chr2R:8769117-8769468	1-1000 bp	352
94	chr3R	3319552	chr3R:3319552-3320279	1-1000 bp	728
95	chr2R	15849157	chr2R:15849157-15849162	1-10 bp	6
95	chr3L	15151071	chr3L:15151071-15151075	1-10 bp	5
95	chr2L	10413703	chr2L:10413703-10413706	1-10 bp	4
95	chrX	16966210	chrX:16966210-16966260	1-1000 bp	51
95	chr3R	19024828	chr3R:19024828-19025176	1-1000 bp	349
95	chr3R	31670445	chr3R:31670445-31670662	1-1000 bp	218
95	chrX	16779037	chrX:16779037-16779200	1-1000 bp	164
95	chr3R	30310398	chr3R:30310398-30310508	1-1000 bp	111
95	chr3L	17022848	chr3L:17022848-17023391	1-1000 bp	544
95	chr3L	6829315	chr3L:6829315-6829947	1-1000 bp	633
95	chr3R	17236791	chr3R:17236791-17237430	1-1000 bp	640
95	chr2L	5759583	chr2L:5759583-5759588	1-1000 bp	6
95	chr3L	27855671	chr3L:27855671-27855790	1-1000 bp	120
96	chr2L	21501317	chr2L:21501317-21501322	1-10 bp	6
96	chr2L	5104144	chr2L:5104144-5104152	1-10 bp	9
96	chr3R	9671377	chr3R:9671377-9671381	1-10 bp	5
96	chr2R	6400717	chr2R:6400717-6400720	1-10 bp	4
96	chr3L	19378454	chr3L:19378454-19378460	1-10 bp	7
96	chrX	17291880	chrX:17291880-17291881	1-10 bp	2
96	chr2L	6424548	chr2L:6424548-6424556	1-10 bp	9
96	chr2R	15014355	chr2R:15014355-15014395	1-1000 bp	41
96	chr2R	21972390	chr2R:21972390-21973126	1-1000 bp	737
96	chr2R	17940622	chr2R:17940622-17940701	1-1000 bp	80
96	chr3R	24119203	chr3R:24119203-24119640	1-1000 bp	438
97	chr3R	14425948	chr3R:14425948-14425955	1-10 bp	8
97	chr2R	23842885	chr2R:23842885-23842890	1-10 bp	6
97	chr2L	6232246	chr2L:6232246-6232250	1-10 bp	5
97	chr3L	14991888	chr3L:14991888-14991891	1-10 bp	4
97	chr3L	11173152	chr3L:11173152-11173577	1-1000 bp	426
98	chr2L	6686158	chr2L:6686158-6686159	1-10 bp	2
98	chrX	23541405	chrX:23541405-23541412	1-10 bp	8
98	chr3L	3691699	chr3L:3691699-3691706	1-10 bp	8
98	chr2L	4962798	chr2L:4962798-4962800	1-10 bp	3
98	chr3R	1310871	chr3R:1310871-1311618	1-1000 bp	748
98	chr2R	22426576	chr2R:22426576-22427348	1-1000 bp	773
99	chr3R	16239511	chr3R:16239511-16239515	1-10 bp	5
99	chr3R	12651852	chr3R:12651852-12651856	1-10 bp	5
99	chr3L	5322499	chr3L:5322499-5322508	1-10 bp	10
99	chr2R	6167833	chr2R:6167833-6167840	1-10 bp	8
99	chr3R	14098971	chr3R:14098971-14098975	1-10 bp	5
99	chr3L	9957328	chr3L:9957328-9957332	1-10 bp	5
99	chr3R	18035409	chr3R:18035409-18035414	1-10 bp	6
99	chr3L	3801396	chr3L:3801396-3801396	1-10 bp	1
99	chr3L	4815008	chr3L:4815008-4815447	1-1000 bp	440
99	chr3R	14129479	chr3R:14129479-14130213	1-1000 bp	735
99	chr2R	12127572	chr2R:12127572-12128481	1-1000 bp	910
